# Supplementary material for: Financial toxicity in cancer patients treated with radiotherapy in Germany—a cross-sectional study
Source: Springer Nature journal article supplement (doi:10.1007/s00066-022-01936-z), 2022-04-25
Supplement: MOESM1 [file 20341332]

English translation – see below for the original version in German

**Patient survey on financial burden in the context of radiotherapy**

**Sozio-demographic data**

|                                                    |                                                                                                                                                                                                                                                                     |                                  |
|----------------------------------------------------|---------------------------------------------------------------------------------------------------------------------------------------------------------------------------------------------------------------------------------------------------------------------|----------------------------------|
| 1.) Sex:                                           | <input type="checkbox"/> female                                                                                                                                                                                                                                     | <input type="checkbox"/> male    |
| 2.) How old are you?                               | _____ years                                                                                                                                                                                                                                                         |                                  |
| 3.) How do you live?                               | <input type="checkbox"/> alone <input type="checkbox"/> with spouse <input type="checkbox"/> with partner                                                                                                                                                           |                                  |
| 4.) How many persons are living in your household? | ___ ( <i>number, including yourself</i> )                                                                                                                                                                                                                           |                                  |
| 5.) Your highest school graduation:                | <input type="checkbox"/> None <input type="checkbox"/> < 10 years of education („ <i>Hauptschulabschluss</i> “) <input type="checkbox"/> 10 years of education („ <i>Realschulabschluss</i> “) <input type="checkbox"/> > 10 years of education („ <i>Abitur</i> “) |                                  |
| 6.) What is your health insurance?                 | <input type="checkbox"/> social                                                                                                                                                                                                                                     | <input type="checkbox"/> private |
| 6a.) if social: Are you exempt from copayments?    | <input type="checkbox"/> Yes                                                                                                                                                                                                                                        | <input type="checkbox"/> No      |

**Clinical data**

|                                                                           |                                                                                                                                                                                                                                                                                                                       |  |
|---------------------------------------------------------------------------|-----------------------------------------------------------------------------------------------------------------------------------------------------------------------------------------------------------------------------------------------------------------------------------------------------------------------|--|
| 7.) When was the cancer you are currently treated for diagnosed first?    | _____/_____<br>( <i>mm/yyyy</i> )                                                                                                                                                                                                                                                                                     |  |
| 8.) For which type of cancer are you currently treated with radiotherapy? | <input type="checkbox"/> Breast cancer <input type="checkbox"/> Prostate cancer <input type="checkbox"/> Head and Neck cancer<br><input type="checkbox"/> Lung cancer <input type="checkbox"/> Esophageal cancer <input type="checkbox"/> Rectal Cancer<br><br><input type="checkbox"/> other: ( <i>please note</i> ) |  |
| 9.) Did you receive chemotherapy along with your radiotherapy?            | <input type="checkbox"/> Yes <input type="checkbox"/> No    ( <i>hormone therapy excluded</i> )                                                                                                                                                                                                                       |  |
| 10.) Have you been hospitalized during your radiotherapy?                 | <input type="checkbox"/> Yes, throughout <input type="checkbox"/> Yes, in part <input type="checkbox"/> No, not at all                                                                                                                                                                                                |  |

**Employment and financial data**

|                                                                                                                                                     |                                                                                                                                                                                                                                              |  |  |
|-----------------------------------------------------------------------------------------------------------------------------------------------------|----------------------------------------------------------------------------------------------------------------------------------------------------------------------------------------------------------------------------------------------|--|--|
| 11.) What is your current employment status?                                                                                                        | <input type="checkbox"/> Employed <input type="checkbox"/> Self-employed <input type="checkbox"/> Official <input type="checkbox"/> Unemployed <input type="checkbox"/> Retired                                                              |  |  |
| 12.) What is your monthly net household income? This means, the money at your disposal after deduction of taxes and social insurance contributions. | <input type="checkbox"/> < 1.300 € <input type="checkbox"/> 1.301 – 1.700 € <input type="checkbox"/> 1.701 – 2.600 €<br><input type="checkbox"/> 2.601 – 3.600 € <input type="checkbox"/> 3.600 – 5.000 € <input type="checkbox"/> > 5.000 € |  |  |

- 13.) Have you been on sick leave during your radiotherapy?  Yes  No
- 14.) Did you have any loss of income due to your radiotherapy?  
 Yes  No
- 14a.) If yes, to which degree overall?  
 < 100 €  101 - 500€  501 - 1500€  1501 - 2500€  > 2500€
- 15.) Did you have any additional costs due to your radiotherapy? (e.g. copayments, medicines exempt from reimbursement etc.)?  Yes  No
- 15a.) If yes, to which degree overall?  
 < 100 €  101 - 500€  501 - 1500€  1501 - 2500€  > 2500€
- 15b.) What were the reasons for additional costs? (*multiple choices possible*)
- Copayments (e.g. drugs, therapeutic products, medical aids, hospital stay etc.)
- Transportation
- Drugs/Products for supportive care to alleviate side effects of radiotherapy that are exempt from reimbursement (e.g. care lotions or washes)
- Alternative medicines for supportive care to alleviate side effects of radiotherapy that are exempt from reimbursement (e.g. homoeopathy)
- Other (e.g. PET-CT) (*please note*):
- 16.) *During the past week*: has your physical condition or medical treatment caused you financial difficulties?  
 Not at all  A little  Quite a bit  Very much
- 17.) On a scale from 1 (not well informed) to 5 (very well informed):  
 At the beginning of your radiotherapy, how well were you informed about any personal financial burden in the context of radiotherapy?
- |                          |   |   |   |                           |
|--------------------------|---|---|---|---------------------------|
| 1                        | 2 | 3 | 4 | 5                         |
| <i>Not well informed</i> |   |   |   | <i>Very well informed</i> |
- 18.) On a scale from 1 (strongly disagree) to 5 (strongly agree):  
 My radiation oncologist should inform me about any financial burden in the context of radiotherapy.
- |                          |   |   |   |                       |
|--------------------------|---|---|---|-----------------------|
| 1                        | 2 | 3 | 4 | 5                     |
| <i>Strongly disagree</i> |   |   |   | <i>Strongly agree</i> |

**Health status and quality of life**

*For the following questions please circle the number between 1 and 7 that best applies to you:*

- 19.) How would you rate your overall health during the past week?
- |                  |   |   |   |   |   |                  |
|------------------|---|---|---|---|---|------------------|
| 1                | 2 | 3 | 4 | 5 | 6 | 7                |
| <i>Very poor</i> |   |   |   |   |   | <i>Excellent</i> |
- 20.) How would you rate your overall quality of life during the past week?
- |                  |   |   |   |   |   |                  |
|------------------|---|---|---|---|---|------------------|
| 1                | 2 | 3 | 4 | 5 | 6 | 7                |
| <i>Very poor</i> |   |   |   |   |   | <i>Excellent</i> |

**Patientenfragebogen zur finanziellen Belastung im Rahmen der Strahlentherapie**

**Sozio-Demographische Aspekte**

1.) Geschlecht:  weiblich  männlich

2.) Wie alt sind Sie? \_\_\_\_\_ Jahre

3.) Wie leben Sie?  
 alleine  mit Ehepartner/-in  mit Lebenspartner/-in

4.) Wie viele Personen leben in Ihrem Haushalt? \_\_\_\_\_ (Anzahl, Sie eingeschlossen)

5.) Ihr höchster Schulabschluss:  
 kein Abschluss  Hauptschulabschluss  Realschulabschluss  Abitur

6.) Wie sind Sie krankenversichert?  gesetzlich  privat  
 6a.) falls gesetzlich: Sind Sie von Zuzahlungen befreit?  Ja  Nein

**Angaben zur Erkrankung**

7.) Wann wurde die aktuell behandelte Tumorerkrankung bei Ihnen zuerst festgestellt?  
 \_\_\_\_\_/\_\_\_\_\_ (Monat/Jahr, z.B. 05/2021)

8.) Für welche Tumorerkrankung erhalten Sie aktuell die Strahlentherapie?  
 Brustkrebs  Prostatakrebs  Rachen-/Mundhöhlen- / Kehlkopfkrebs  
 Lungenkrebs  Speiseröhrenkrebs  Darmkrebs  
 sonstige, nicht aufgeführte Tumorerkrankung:  
 (bitte notieren)

9.) Haben Sie parallel zur aktuellen Strahlentherapie eine Chemotherapie erhalten?  
 Ja  Nein (Hormontherapie zählt nicht dazu)

10.) Erfolgte die Strahlentherapie stationär, d.h. waren Sie stationär im Krankenhaus aufgenommen?  Ja, durchgehend  Ja, teilweise  Nein, gar nicht

**Berufliche und finanzielle Aspekte**

11.) Wie ist Ihr aktueller Erwerbsstatus?  
 Angestellt  Selbstständig  Beamter/in  nicht erwerbstätig  berentet

12.) Wie hoch ist ihr gesamtes monatlich verfügbares Haushalts-Nettoeinkommen, also das Geld, das nach Abzug der Steuern und Sozialversicherungsbeiträge dem gesamten Haushalt übrigbleibt?  
 unter 1.300 €  1.301 – 1.700 €  1.701 – 2.600 €  
 2.601 – 3.600 €  3.600 – 5.000 €  über 5.000 €

13.) Waren/sind Sie während der Strahlentherapie krankgeschrieben?  Ja  Nein

- 14.) Sind Ihnen in Folge Ihrer aktuellen Behandlung in der Strahlentherapie Einkommenseinbußen entstanden?  Ja  Nein
- 14a.) Wenn ja, in welcher Höhe insgesamt?
- unter 100 €  101 - 500€  501 - 1500€  1501 - 2500€  über 2500€
- 15.) Haben Sie in Folge Ihrer aktuellen Behandlung in der Strahlentherapie höhere Ausgaben (z.B. Zuzahlungen, nicht-erstattete Arzneien etc.)?  Ja  Nein
- 15a.) Wenn ja, in welcher Höhe insgesamt?
- unter 100 €  101 - 500€  501 - 1500€  1501 - 2500€  über 2500€
- 15b.) Wodurch fallen Ihnen höhere Ausgaben an? (*Mehrfachnennungen möglich*)
- Zuzahlung (z.B. Arznei- / Heil- / Hilfsmittel, Krankenhausaufenthalt etc.)
- Fahrtkosten
- Arzneimittel/Pflegeprodukte zur Linderung von Nebenwirkungen der Strahlentherapie, die nicht erstattet werden (z.B. pflegende Salben/Spülungen)
- Alternativmedizinische Mittel zur Linderung von Nebenwirkungen der Strahlentherapie, die nicht erstattet werden (z.B. Homöopathie)
- Sonstiges (z.B. PET-CT) (*bitte notieren*):
- 16.) *Während der letzten Woche*: Hat Ihr körperlicher Zustand oder Ihre medizinische Behandlung für Sie finanzielle Schwierigkeiten mit sich gebracht?
- überhaupt nicht  wenig  mäßig  sehr
- 17.) Auf einer Skala von 1 (nicht gut informiert) bis 5 (sehr gut informiert):  
Wie gut waren Sie bei Behandlungsbeginn über etwaige persönliche finanzielle Belastungen im Rahmen der Strahlentherapie informiert?
- |                             |   |   |   |                            |
|-----------------------------|---|---|---|----------------------------|
| 1                           | 2 | 3 | 4 | 5                          |
| <i>nicht gut informiert</i> |   |   |   | <i>sehr gut informiert</i> |
- 18.) Auf einer Skala von 1 (stimme gar nicht zu) bis 5 (stimme voll zu):  
Mein(e) Strahlentherapeut(in) sollte mich über etwaige persönliche finanzielle Belastungen im Rahmen der Strahlentherapie informieren.
- |                            |   |   |   |                       |
|----------------------------|---|---|---|-----------------------|
| 1                          | 2 | 3 | 4 | 5                     |
| <i>stimme gar nicht zu</i> |   |   |   | <i>stimme voll zu</i> |

### Gesundheit und Lebensqualität

*Bitte kreuzen Sie bei beiden folgenden Fragen die Zahl zwischen 1 und 7 an,  
die am besten auf Sie zutrifft:*

- 19.) Wie würden Sie insgesamt Ihren Gesundheitszustand während der letzten Woche einschätzen?
- |                      |   |   |   |   |   |                      |
|----------------------|---|---|---|---|---|----------------------|
| 1                    | 2 | 3 | 4 | 5 | 6 | 7                    |
| <i>sehr schlecht</i> |   |   |   |   |   | <i>ausgezeichnet</i> |
- 20.) Wie würden Sie insgesamt Ihre Lebensqualität während der letzten Woche einschätzen?
- |                      |   |   |   |   |   |                      |
|----------------------|---|---|---|---|---|----------------------|
| 1                    | 2 | 3 | 4 | 5 | 6 | 7                    |
| <i>sehr schlecht</i> |   |   |   |   |   | <i>ausgezeichnet</i> |

## Vielen Dank für Ihre Zeit und Teilnahme

Bitte geben Sie den Fragebogen im verschlossenen Umschlag beim Klinikpersonal ab.
